# Supplementary material for: Exploring Diagnostic Precision and Triage Proficiency: A Comparative Study of GPT-4 and Bard in Addressing Common Ophthalmic Complaints
Source: MDPI journal article supplement (doi:10.3390/bioengineering11020120), 2024-01-26
Supplement: s1 [file s1]

**Table S1.** Compilation of anterior segment/glaucoma/comprehensive simulated patient complaints.

| <b>Anterior segment/glaucoma/ comprehensive</b>                |                             |                                                              |                                                                                                             |
|----------------------------------------------------------------|-----------------------------|--------------------------------------------------------------|-------------------------------------------------------------------------------------------------------------|
| <b>Pre-specified simulated ophthalmologic diagnosis</b>        | <b>Pre-specified acuity</b> | <b>3 descriptor simulated patient ophthalmic complaint</b>   | <b>5 descriptor simulated patient ophthalmic complaint</b>                                                  |
| Acute angle closure glaucoma                                   | Same Day                    | My eye is painful, and I see a lot of halos.                 | I had a dilated eye exam earlier today and now my eye is painful and I am noticing a lot of halos.          |
| Corneal ulcer                                                  | Same Day                    | My eye is very painful and red.                              | I fell asleep with my contact lenses and now my eye is very painful and red.                                |
| Chemical injury                                                | Same Day                    | My right eye is painful and tearing.                         | I accidentally splashed some bleach in my right eye and now it is painful and tearing.                      |
| Recurrent corneal erosion                                      | Non-urgent                  | I had pain in my right eye that resolved in a few hours.     | I woke up with pain in my right eye that resolved in a few hours. This has happened many times in the past. |
| Anterior uveitis                                               | Urgent                      | I have right eye pain and extreme light sensitivity.         | I have new right eye pain, extreme light sensitivity, and my joints have been hurting more than usual.      |
| Traumatic iritis                                               | Urgent                      | My right eye is light sensitive and a little blurred.        | A ball hit me in the right eye a few days ago and I've been light sensitive and a little blurred.           |
| Acute rise in intraocular pressure/pigment dispersion syndrome | Non-urgent                  | I have blurred vision and glare after strenuous exercise.    | I have been noticing blurred vision in both eyes and glare after strenuous exercise.                        |
| Subconjunctival hemorrhage                                     | Non-urgent                  | There is a red spot on my eye – it looks like it's bleeding. | I was coughing hard all day today and now there is a red spot on                                            |

|                                        |            |                                                                                  |                                                                                                                                                                    |
|----------------------------------------|------------|----------------------------------------------------------------------------------|--------------------------------------------------------------------------------------------------------------------------------------------------------------------|
|                                        |            |                                                                                  | my eye – it looks like it's bleeding.                                                                                                                              |
| Posterior capsular opacification       | Non-urgent | The vision in the eye I had cataract surgery 1 year ago is blurry.               | I had cataract surgery one year ago and my vision was pretty good after that. Now the vision in that eye is blurry again.                                          |
| Glaucoma suspect / ocular hypertension | Non-urgent | My eye pressure was a little higher than normal in both eyes. My vision is fine. | I was at an eye screening event, and they told me my eye pressure was a little higher than normal in both eyes. My vision is fine and I don't feel anything wrong. |

**Table S2.** Compilation of neuro-ophthalmology simulated patient complaints.

| <b>Neuro-ophthalmology</b>                              |                             |                                                                                                        |                                                                                                                                                                  |
|---------------------------------------------------------|-----------------------------|--------------------------------------------------------------------------------------------------------|------------------------------------------------------------------------------------------------------------------------------------------------------------------|
| <b>Pre-specified simulated ophthalmologic diagnosis</b> | <b>Pre-specified acuity</b> | <b>3 descriptor simulated patient ophthalmic complaint</b>                                             | <b>5 descriptor simulated patient ophthalmic complaint</b>                                                                                                       |
| Horner syndrome with carotid dissection                 | Same Day                    | My neck is very painful, and my eye is a little droopy.                                                | I just had a session with my chiropractor and now my neck is very painful, and my eye is a little droopy.                                                        |
| Giant cell arteritis                                    | Same Day                    | I just lost vision in my left eye.                                                                     | I have been losing weight, have been experiencing scalp tenderness, and now I lost vision in my left eye.                                                        |
| Occipital Stroke                                        | Same Day                    | I'm unable to read or see things on the right side of my vision. It seems like both eyes are affected. | I woke up this morning and I'm unable to read or see things on the right side of my vision. It seems like both eyes are affected. Everything was fine yesterday. |
| Optic neuritis                                          | Urgent                      | The vision in my right eye appears washed out and I have some pain.                                    | The vision in my right eye has seemed washed out over the last few days. I'm also having some pain with eye movements in that eye.                               |
| Ocular Myasthenia gravis                                | Urgent                      | My right eyelid droops and gets worse as the day goes on.                                              | I have been noticing my right eyelid drooping. It gets worse as the day goes on and I also notice double vision.                                                 |

|                        |            |                                                                                     |                                                                                                                                       |
|------------------------|------------|-------------------------------------------------------------------------------------|---------------------------------------------------------------------------------------------------------------------------------------|
| Trochlear nerve palsy  | Urgent     | I have double vision all the time. The double vision goes away when I close an eye. | I recently hit my head on a cabinet and now I'm noticing double vision all the time. The double vision goes away when I close an eye. |
| Oculomotor nerve palsy | Same Day   | My right eye is suddenly really droopy.                                             | My right eye is suddenly really droopy and it seems like my eyes don't work together. I'm having double vision as well.               |
| Migraine with aura     | Non-urgent | I saw a shimmering static light for about 15 minutes and then had a headache.       | I saw a shimmering static light for about 15 minutes and then had a headache. I'm 30 years old and I've never had this before.        |
| Orbicularis myokymia   | Non-urgent | My right eyelid has been twitching.                                                 | My right eyelid has been twitching off and on for several days.                                                                       |
| Optic disk drusen      | Non-urgent | My optic nerve has a unique appearance to it and there are "little deposits".       | My eye doctor recently told me my right optic nerve has a unique appearance to it and that there are "little deposits".               |

**Table S3.** Compilation of pediatric/oculoplastic simulated patient complaints.

| <b>Pediatric/oculoplastic</b>                           |                             |                                                                               |                                                                                                               |
|---------------------------------------------------------|-----------------------------|-------------------------------------------------------------------------------|---------------------------------------------------------------------------------------------------------------|
| <b>Pre-specified simulated ophthalmologic diagnosis</b> | <b>Pre-specified acuity</b> | <b>3 descriptor simulated patient ophthalmic complaint</b>                    | <b>5 descriptor simulated patient ophthalmic complaint</b>                                                    |
| Leukocoria / rule out retinoblastoma                    | Urgent                      | I took a picture and in the photo one pupil was very white.                   | I took a picture of my infant and in the photo one pupil was very white and one pupil looked normal.          |
| Muscle entrapment / Orbital fracture                    | Same Day                    | My 12-year-old son has double vision and nausea when he tries to look around. | My 12-year-old son fell on his face and now has double vision and nausea when he tries to look around.        |
| Pre-septal cellulitis                                   | Urgent                      | My child's eye is swollen.                                                    | My toddler had a bug bite near her eye a few days ago and now it's swollen.                                   |
| Thyroid eye disease                                     | Non-urgent                  | My eyes bulge out of my face and they feel irritated.                         | My eyes have recently started to bulge out of my face, and they feel irritated and sensitive.                 |
| Strabismus                                              | Non-urgent                  | My 3-year-old's eyes cross.                                                   | My 3-year-old's eyes sometimes cross. She doesn't seem to be able to control it.                              |
| Basal cell carcinoma/squamous cell carcinoma            | Urgent                      | I have a bump on my right eyelid that is growing.                             | I have a bump on my right eyelid that is growing and sometimes bleeds. It's also making me lose my eyelashes. |
| Dacryocystitis                                          | Urgent                      | My toddler has a bump by her eye.                                             | My toddler has a painful bump under the corner of her right eye by her nose.                                  |
| Nasolacrimal duct obstruction                           | Non-urgent                  | My 6-month-old's right eye tears up.                                          | My 6-month-old's right eye always tears up and has crusty lashes.                                             |

|                    |            |                                              |                                                                                                          |
|--------------------|------------|----------------------------------------------|----------------------------------------------------------------------------------------------------------|
| Aponeurotic ptosis | Non-urgent | My right eyelid has been droopy.             | I had cataract surgery and my right eyelid has been droopy ever since. It hasn't gotten better or worse. |
| Blepharitis        | Non-urgent | My eyes itch, and I get flakes in my lashes. | My eyes itch and I get flakes in my lashes, but my vision is good. This has been going on for months.    |

**Table S4.** Compilation of retina simulated patient complaints.

| <b>Retina</b>                                           |                             |                                                                                                         |                                                                                                                                        |
|---------------------------------------------------------|-----------------------------|---------------------------------------------------------------------------------------------------------|----------------------------------------------------------------------------------------------------------------------------------------|
| <b>Pre-specified simulated ophthalmologic diagnosis</b> | <b>Pre-specified acuity</b> | <b>3 descriptor simulated patient ophthalmic complaint</b>                                              | <b>5 descriptor simulated patient ophthalmic complaint</b>                                                                             |
| Endophthalmitis                                         | Same Day                    | My eye is very painful, and my vision is very blurry.                                                   | I recently had an eyeball injection, and now my eye is very painful and my vision is very blurry.                                      |
| Retinal detachment                                      | Same Day                    | I see dots, bright lights, and noticed a shade coming into my vision.                                   | In the last day I started seeing dots and bright lights in my right eye. I also noticed a shade coming into my vision.                 |
| Amaurosis fugax                                         | Same Day                    | The vision became really dark but then improved over about 30 minutes and my vision returned to normal. | The vision in my right eye became really dark, but then it gradually improved over about 30 minutes and my vision returned to normal.  |
| Choroidal neovascular membrane or wet AMD               | Urgent                      | Straight lines appear wavy and things are more blurry in my right eye.                                  | I have macular degeneration and have recently noticed that straight lines have become wavy and things are more blurry in my right eye. |
| Vitreous hemorrhage/proliferative diabetic retinopathy  | Urgent                      | I just started seeing a lot of red dots in my right eye.                                                | I have diabetes and just started seeing a lot of red dots in my right eye. It is making it difficult to see through.                   |
| Acute posterior vitreous detachment                     | Urgent                      | I see flashing lights in my vision and a new cobweb-like thing in my right eye.                         | I just started noticing flashing lights in my vision and see a new cobweb-like thing in my right eye. I keep                           |

|                                  |            |                                                                         |                                                                                                                                     |
|----------------------------------|------------|-------------------------------------------------------------------------|-------------------------------------------------------------------------------------------------------------------------------------|
|                                  |            |                                                                         | thinking it's a fruit fly.                                                                                                          |
| Central Serous Chorioretinopathy | Urgent     | I have a new smudge in the center of my right vision.                   | I have a new smudge and distortion in the center of my right vision. I have also been very stressed at work.                        |
| Gas bubble                       | Non-urgent | I see a horizontal line halfway in my vision that bobs with my head.    | I had a retinal detachment surgery a few weeks ago. I'm now noticing a horizontal line halfway in my vision that bobs with my head. |
| Floaters                         | Non-urgent | I sometimes see a floater in my right eye.                              | I had an episode of flashes and floaters in my right eye years ago that has resolved. I sometimes still see a floater.              |
| Post-injection irritation        | Non-urgent | I had an injection in my eye, and it feels like something is in my eye. | I had an injection in my eye today and my eye has felt scratchy. It feels like something is in my eye.                              |



**Table S5.** Questionnaire to grade chatbot responses.

|                                                                                                                                                                                                                                                                                                                                                                                                        |
|--------------------------------------------------------------------------------------------------------------------------------------------------------------------------------------------------------------------------------------------------------------------------------------------------------------------------------------------------------------------------------------------------------|
| <b>Does the chatbot provide the correct diagnosis as the stated most likely cause of the patient's symptoms?</b>                                                                                                                                                                                                                                                                                       |
| Yes                                                                                                                                                                                                                                                                                                                                                                                                    |
| No                                                                                                                                                                                                                                                                                                                                                                                                     |
| N/A, the chatbot does not provide a most likely cause                                                                                                                                                                                                                                                                                                                                                  |
| <b>Does the chatbot provide the correct diagnosis somewhere in the chatbot conversation, i.e., in the possible causes or as the most likely cause?</b>                                                                                                                                                                                                                                                 |
| Yes                                                                                                                                                                                                                                                                                                                                                                                                    |
| No                                                                                                                                                                                                                                                                                                                                                                                                     |
| <b>How relevant is the differential diagnosis provided by the chatbot?</b>                                                                                                                                                                                                                                                                                                                             |
| 4 – very relevant                                                                                                                                                                                                                                                                                                                                                                                      |
| 3 – somewhat relevant                                                                                                                                                                                                                                                                                                                                                                                  |
| 2 – somewhat irrelevant                                                                                                                                                                                                                                                                                                                                                                                |
| 1 – very irrelevant                                                                                                                                                                                                                                                                                                                                                                                    |
| <b>The chatbot provides an appropriate triage recommendation with respect to timeframe in which to seek medical attention and urgency of issue.</b>                                                                                                                                                                                                                                                    |
| 4 – I completely agree                                                                                                                                                                                                                                                                                                                                                                                 |
| 3 – I somewhat agree                                                                                                                                                                                                                                                                                                                                                                                   |
| 2 – I somewhat disagree                                                                                                                                                                                                                                                                                                                                                                                |
| 1 – I completely disagree                                                                                                                                                                                                                                                                                                                                                                              |
| <b>If you did NOT completely agree (4) with the triage recommendation provided by the chatbot, do you feel that the chatbot response was an over-triage (i.e., recommending seeking evaluation sooner than indicated or overdoing the severity/urgency of an issue) or an under-triage (i.e., not recommending evaluation soon enough or not emphasizing the severity/urgency of an issue enough)?</b> |

---

Over-triage

Under-triage

N/A, I completely agreed (4) with the triage recommendations

---

**How satisfied would you be if these chatbot responses were given to a real patient?**

---

4 – very satisfied

3 – somewhat satisfied

2 – somewhat dissatisfied

1 – very dissatisfied

---

**In your expert opinion, would the chatbot's response pose harm if provided to an actual patient?**

---

Yes

No

**Table S6.** Sub-analysis of primary and secondary outcomes of GPT-4 – 5 descriptor cohort by urgency level.

| Variable                                                                                                                                               | Overall,<br>N = 40 <sup>1</sup> | Non-Urgent,<br>N = 16 <sup>1</sup> | Urgent,<br>N = 13 <sup>1</sup> | Same day,<br>N = 11 <sup>1</sup> | p-<br>value <sup>2</sup> |
|--------------------------------------------------------------------------------------------------------------------------------------------------------|---------------------------------|------------------------------------|--------------------------------|----------------------------------|--------------------------|
| <b>Does the chatbot provide the correct diagnosis as the stated most likely cause of the patient's symptoms?</b>                                       |                                 |                                    |                                |                                  | >0.9                     |
| No                                                                                                                                                     | 14<br>(35.00%)                  | 5 (31.25%)                         | 5 (38.46%)                     | 4 (36.36%)                       |                          |
| Yes                                                                                                                                                    | 26<br>(65.00%)                  | 11<br>(68.75%)                     | 8 (61.54%)                     | 7 (63.64%)                       |                          |
| <b>Does the chatbot provide the correct diagnosis somewhere in the chatbot conversation, i.e., in the possible causes or as the most likely cause?</b> |                                 |                                    |                                |                                  | 0.10                     |
| No                                                                                                                                                     | 3 (7.50%)                       | 3 (18.75%)                         | 0 (0.00%)                      | 0 (0.00%)                        |                          |
| Yes                                                                                                                                                    | 37<br>(92.50%)                  | 13<br>(81.25%)                     | 13<br>(100.00%)                | 11<br>(100.00%)                  |                          |
| <b>The chatbot provides an appropriate triage recommendation with respect to timeframe in which to seek medical attention and urgency of issue.</b>    |                                 |                                    |                                |                                  | >0.9                     |
| 1 or 2 - I completely or somewhat disagree                                                                                                             | 1 (2.50%)                       | 1 (6.25%)                          | 0 (0.00%)                      | 0 (0.00%)                        |                          |
| 3 or 4 - I completely or somewhat agree                                                                                                                | 39<br>(97.50%)                  | 15<br>(93.75%)                     | 13<br>(100.00%)                | 11<br>(100.00%)                  |                          |
| <b>Do you completely agree with the triage recommendation provided by the chatbot?</b>                                                                 |                                 |                                    |                                |                                  | >0.9                     |
| I do not completely agree                                                                                                                              | 4 (10.00%)                      | 2 (12.50%)                         | 1 (7.69%)                      | 1 (9.09%)                        |                          |
| I completely agree                                                                                                                                     | 36<br>(90.00%)                  | 14<br>(87.50%)                     | 12<br>(92.31%)                 | 10<br>(90.91%)                   |                          |

| Variable                                                                                         | Overall,<br>N = 40 <sup>I</sup> | Non-Urgent,<br>N = 16 <sup>I</sup> | Urgent,<br>N = 13 <sup>I</sup> | Same day,<br>N = 11 <sup>I</sup> | p-value <sup>2</sup> |
|--------------------------------------------------------------------------------------------------|---------------------------------|------------------------------------|--------------------------------|----------------------------------|----------------------|
| How relevant is the differential diagnosis provided by the chatbot?                              |                                 |                                    |                                |                                  | 0.3                  |
| 1 or 2 - very or somewhat irrelevant                                                             | 2 (5.00%)                       | 2 (12.50%)                         | 0 (0.00%)                      | 0 (0.00%)                        |                      |
| 3 or 4 - somewhat or very relevant                                                               | 38 (95.00%)                     | 14 (87.50%)                        | 13 (100.00%)                   | 11 (100.00%)                     |                      |
| How satisfied would you be if these chatbot responses were given to a real patient?              |                                 |                                    |                                |                                  | 0.8                  |
| 1 or 2 - very or somewhat dissatisfied                                                           | 3 (7.50%)                       | 2 (12.50%)                         | 1 (7.69%)                      | 0 (0.00%)                        |                      |
| 3 or 4 - very or somewhat satisfied                                                              | 37 (92.50%)                     | 14 (87.50%)                        | 12 (92.31%)                    | 11 (100.00%)                     |                      |
| In your expert opinion, would the chatbot's response pose harm if provided to an actual patient? |                                 |                                    |                                |                                  |                      |
| No                                                                                               | 40 (100.00%)                    | 16 (100.00%)                       | 13 (100.00%)                   | 11 (100.00%)                     |                      |

<sup>I</sup> n (%)

<sup>2</sup> Fisher's exact test

**Table S7.** Sub-analysis of primary and secondary outcomes of GPT-4 – 5 descriptor cohort by subspecialty.

|                                                                                                                                                        |                     | Ant. Segment/       |                     | Ped/                |                     |                      |
|--------------------------------------------------------------------------------------------------------------------------------------------------------|---------------------|---------------------|---------------------|---------------------|---------------------|----------------------|
|                                                                                                                                                        | Overall,            | Glaucoma,           | Neuro-ophth,        | Oculo -plastics,    | Retina,             |                      |
| Variable                                                                                                                                               | N = 40 <sup>1</sup> | N = 10 <sup>1</sup> | p-value <sup>2</sup> |
| <b>Does the chatbot provide the correct diagnosis as the stated most likely cause of the patient's symptoms?</b>                                       |                     |                     |                     |                     |                     |                      |
| No                                                                                                                                                     | 14<br>(35.00%)      | 3 (30.00%)          | 2 (20.00%)          | 4 (40.00%)          | 5 (50.00%)          | 0.7                  |
| Yes                                                                                                                                                    | 26<br>(65.00%)      | 7 (70.00%)          | 8 (80.00%)          | 6 (60.00%)          | 5 (50.00%)          |                      |
| <b>Does the chatbot provide the correct diagnosis somewhere in the chatbot conversation, i.e., in the possible causes or as the most likely cause?</b> |                     |                     |                     |                     |                     |                      |
| No                                                                                                                                                     | 3 (7.50%)           | 2 (20.00%)          | 0 (0.00%)           | 0 (0.00%)           | 1 (10.00%)          | 0.6                  |
| Yes                                                                                                                                                    | 37<br>(92.50%)      | 8 (80.00%)          | 10 (100.00%)        | 10<br>(100.00%)     | 9 (90.00%)          |                      |
| <b>The chatbot provides an appropriate triage recommendation with respect to timeframe in which to seek medical attention and urgency of issue.</b>    |                     |                     |                     |                     |                     |                      |
| 1 or 2 - I completely or somewhat disagree                                                                                                             | 1 (2.50%)           | 0 (0.00%)           | 0 (0.00%)           | 0 (0.00%)           | 1 (10.00%)          | >0.9                 |
| 3 or 4 - I completely or somewhat agree                                                                                                                | 39<br>(97.50%)      | 10<br>(100.00%)     | 10 (100.00%)        | 10<br>(100.00%)     | 9 (90.00%)          |                      |

| Variable                                                                                                | Ant. Segment/                   |                                  |                                     | Ped/                                    |                                | p-value <sup>2</sup> |
|---------------------------------------------------------------------------------------------------------|---------------------------------|----------------------------------|-------------------------------------|-----------------------------------------|--------------------------------|----------------------|
|                                                                                                         | Overall,<br>N = 40 <sup>1</sup> | Glaucoma,<br>N = 10 <sup>1</sup> | Neuro-ophth,<br>N = 10 <sup>1</sup> | Oculo -plastics,<br>N = 10 <sup>1</sup> | Retina,<br>N = 10 <sup>1</sup> |                      |
| <b>Do you completely agree with the triage recommendation provided by the chatbot?</b>                  |                                 |                                  |                                     |                                         |                                | 0.2                  |
| I do not completely agree                                                                               | 4<br>(10.00%)                   | 0 (0.00%)                        | 0 (0.00%)                           | 1 (10.00%)                              | 3 (30.00%)                     |                      |
| I completely agree                                                                                      | 36<br>(90.00%)                  | 10<br>(100.00%)                  | 10 (100.00%)                        | 9 (90.00%)                              | 7 (70.00%)                     |                      |
| <b>How relevant is the differential diagnosis provided by the chatbot?</b>                              |                                 |                                  |                                     |                                         |                                | 0.2                  |
| 1 or 2 - very or somewhat irrelevant                                                                    | 2 (5.00%)                       | 2 (20.00%)                       | 0 (0.00%)                           | 0 (0.00%)                               | 0 (0.00%)                      |                      |
| 3 or 4 - somewhat or very relevant                                                                      | 38<br>(95.00%)                  | 8 (80.00%)                       | 10 (100.00%)                        | 10<br>(100.00%)                         | 10<br>(100.00%)                |                      |
| <b>How satisfied would you be if these chatbot responses were given to a real patient?</b>              |                                 |                                  |                                     |                                         |                                | >0.9                 |
| 1 or 2 - very or somewhat dissatisfied                                                                  | 3 (7.50%)                       | 1 (10.00%)                       | 0 (0.00%)                           | 1 (10.00%)                              | 1 (10.00%)                     |                      |
| 3 or 4 - very or somewhat satisfied                                                                     | 37<br>(92.50%)                  | 9 (90.00%)                       | 10 (100.00%)                        | 9 (90.00%)                              | 9 (90.00%)                     |                      |
| <b>In your expert opinion, would the chatbot's response pose harm if provided to an actual patient?</b> |                                 |                                  |                                     |                                         |                                |                      |
| No                                                                                                      | 40<br>(100.00%)                 | 10<br>(100.00%)                  | 10 (100.00%)                        | 10<br>(100.00%)                         | 10<br>(100.00%)                |                      |

| Variable | Ant. Segment/                   |                                  |                                     | Ped/                                    |                                | p-value <sup>2</sup> |
|----------|---------------------------------|----------------------------------|-------------------------------------|-----------------------------------------|--------------------------------|----------------------|
|          | Overall,<br>N = 40 <sup>1</sup> | Glaucoma,<br>N = 10 <sup>1</sup> | Neuro-ophth,<br>N = 10 <sup>1</sup> | Oculo -plastics,<br>N = 10 <sup>1</sup> | Retina,<br>N = 10 <sup>1</sup> |                      |

<sup>1</sup> n (%)

<sup>2</sup> Fisher’s exact test

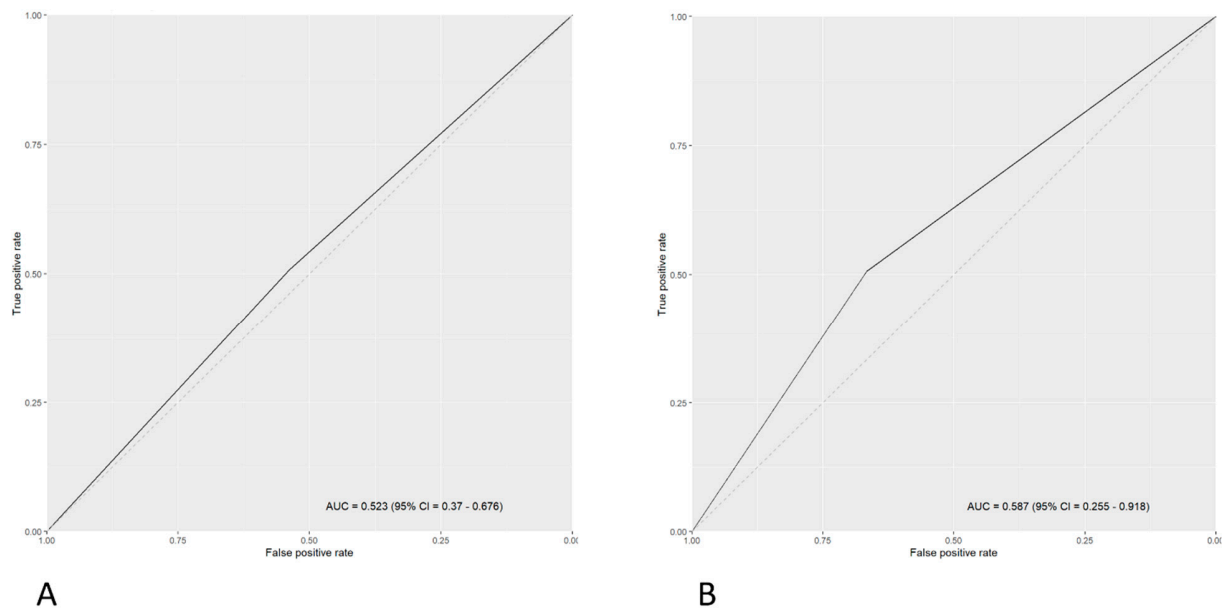

**Figure S1.** Receiver operating characteristic curves for Bard (A) and GPT-4 (B) in providing triage recommendations. The model performance of the degree of detail in prompt predicting the appropriate triage for ChatGPT (AUC 0.587) is better than Bard (AUC 0.523).
